# Supplementary material
Source: bioRxiv or medRxiv preprint supplement (https://www.biorxiv.org/highwire/filestream/36440/field_highwire_adjunct_files/2/124396-3.pdf)
Supplement: Supplementary file [file 124396-3.pdf]

# Supplementary dataset S2: Traits measured in our analyses.

| Type of analysis →               |                                                                                          | Parsons et al. (2015)                                              |                                                                    |                                                                                   |                                                                                             |                                                                                  |                                                                              |                                                                              |                                                                              |                                                                           |                                                                            |                                                           |                                                  |                                                           |                                           |                                                                                 |                                               |                                                                |                                        |                                                                     |
|----------------------------------|------------------------------------------------------------------------------------------|--------------------------------------------------------------------|--------------------------------------------------------------------|-----------------------------------------------------------------------------------|---------------------------------------------------------------------------------------------|----------------------------------------------------------------------------------|------------------------------------------------------------------------------|------------------------------------------------------------------------------|------------------------------------------------------------------------------|---------------------------------------------------------------------------|----------------------------------------------------------------------------|-----------------------------------------------------------|--------------------------------------------------|-----------------------------------------------------------|-------------------------------------------|---------------------------------------------------------------------------------|-----------------------------------------------|----------------------------------------------------------------|----------------------------------------|---------------------------------------------------------------------|
| Complete trait name (and unit) → | Proportion of carbohydrates in the total detected pyrolyzed biomass (%)                  | Proportion of G-lignin in the total detected pyrolyzed biomass (%) | Proportion of S-lignin in the total detected pyrolyzed biomass (%) | Proportion of H-lignin in the total detected pyrolyzed biomass (%)                | Proportion of non-associated phenolic compounds in the total detected pyrolyzed biomass (%) | Proportion of unidentified compounds in the total detected pyrolyzed biomass (%) | Proportion of unknown compounds in the total detected pyrolyzed biomass (%)  | Ratio of 5-lignin to G-lignin in the total detected pyrolyzed biomass (%)    | Ratio of carbohydrates to lignin in the total detected pyrolyzed biomass (%) | Proportion of lignin in the total detected pyrolyzed biomass (%)          |                                                                            |                                                           |                                                  |                                                           |                                           |                                                                                 |                                               |                                                                |                                        |                                                                     |
| Short trait name →               | C                                                                                        | G                                                                  | S                                                                  | H                                                                                 | P                                                                                           | U                                                                                | D                                                                            | SG                                                                           | CC                                                                           | L                                                                         |                                                                            |                                                           |                                                  |                                                           |                                           |                                                                                 |                                               |                                                                |                                        |                                                                     |
| Type of analysis →               |                                                                                          | Direct measurements of growth trait                                |                                                                    |                                                                                   |                                                                                             |                                                                                  |                                                                              |                                                                              |                                                                              |                                                                           |                                                                            |                                                           |                                                  |                                                           |                                           |                                                                                 |                                               |                                                                |                                        |                                                                     |
| Complete trait name (and unit) → | Stem height (cm)                                                                         | Average internode length (cm)                                      | Diameter at the base of the stem (mm)                              | Anisole content (wt@10%)                                                          | Phenolase content (wt@10%)                                                                  | Fucose content (wt@10%)                                                          | Xylose content (wt@10%)                                                      | Rhamnose content (wt@10%)                                                    | 4-C-methylglucosone acid content (wt@10%)                                    | Galactose content (wt@10%)                                                | Galacturonic acid content (wt@10%)                                         | Extractable glucose content (wt@10%)                      | Glucuronic acid content (wt@10%)                 |                                                           |                                           |                                                                                 |                                               |                                                                |                                        |                                                                     |
| Short trait name →               | Height                                                                                   | Internode length                                                   | Diameter                                                           | Anisole                                                                           | Phenol                                                                                      | Fucose                                                                           | Xylose                                                                       | Rhamnose                                                                     | 4-C-Methylglucosone                                                          | Galactose                                                                 | Galacturonic                                                               | Glucose                                                   | Glucuronic                                       |                                                           |                                           |                                                                                 |                                               |                                                                |                                        |                                                                     |
| Type of analysis →               |                                                                                          | Sugar yields after enzymatic hydrolysis without pre-treatment      |                                                                    |                                                                                   |                                                                                             |                                                                                  |                                                                              |                                                                              |                                                                              |                                                                           |                                                                            |                                                           |                                                  |                                                           |                                           |                                                                                 |                                               |                                                                |                                        |                                                                     |
| Complete trait name (and unit) → | Glucose production rate (g/L <sub>h</sub> ) measured every 2 hours without pre-treatment | Anisole released (g/g after 72h) without pre-treatment             | Galactose released (g/g after 72h) without pre-treatment           | Glucose released (g/g after 72h) without pre-treatment                            | Xylose released (g/g after 72h) without pre-treatment                                       | Mannose released (g/g after 72h) without pre-treatment                           | Arabinose released (g/g) by hydrolysis (72h) and in the pre-treatment liquid | Galactose released (g/g) by hydrolysis (72h) and in the pre-treatment liquid | Glucose released (g/g) by hydrolysis (72h) and in the pre-treatment liquid   | Xylose released (g/g) by hydrolysis (72h) and in the pre-treatment liquid | Mannose released (g/g) by hydrolysis (72h) and in the pre-treatment liquid |                                                           |                                                  |                                                           |                                           |                                                                                 |                                               |                                                                |                                        |                                                                     |
| Short trait name →               | GPwp                                                                                     | ARAwp                                                              | GAwp                                                               | GLwp                                                                              | XYwp                                                                                        | MAwp                                                                             | ARAwpL                                                                       | GAwpL                                                                        | GLwpL                                                                        | XYwpL                                                                     | MAwpL                                                                      |                                                           |                                                  |                                                           |                                           |                                                                                 |                                               |                                                                |                                        |                                                                     |
| Type of analysis →               |                                                                                          | Sugar yield in enzymatic hydrolysis after pre-treatment            |                                                                    |                                                                                   |                                                                                             |                                                                                  |                                                                              |                                                                              |                                                                              |                                                                           |                                                                            |                                                           |                                                  |                                                           |                                           |                                                                                 |                                               |                                                                |                                        |                                                                     |
| Complete trait name (and unit) → | Glucose production rate (g/L <sub>h</sub> ) measured every 2 hours after pre-treatment   | Anisole released (g/g after 72h) after pre-treatment               | Galactose released (g/g after 72h) after pre-treatment             | Glucose released (g/g after 72h) after pre-treatment                              | Xylose released (g/g after 72h) after pre-treatment                                         | Mannose released (g/g after 72h) after pre-treatment                             | Arabinose (g/g) in the pre-treatment liquid                                  | Galactose (g/g) in the pre-treatment liquid                                  | Glucose (g/g) in the pre-treatment liquid                                    | Xylose (g/g) in the pre-treatment liquid                                  | Mannose (g/g) in the pre-treatment liquid                                  |                                                           |                                                  |                                                           |                                           |                                                                                 |                                               |                                                                |                                        |                                                                     |
| Short trait name →               | GPwp                                                                                     | ARAwp                                                              | GAwp                                                               | GLwp                                                                              | XYwp                                                                                        | MAwp                                                                             | ARAwp                                                                        | GAwp                                                                         | GLwp                                                                         | XYwp                                                                      | MAwp                                                                       |                                                           |                                                  |                                                           |                                           |                                                                                 |                                               |                                                                |                                        |                                                                     |
| Type of analysis →               |                                                                                          | Siltcon measurement                                                |                                                                    |                                                                                   |                                                                                             |                                                                                  |                                                                              |                                                                              |                                                                              |                                                                           |                                                                            |                                                           |                                                  |                                                           |                                           |                                                                                 |                                               |                                                                |                                        |                                                                     |
| Complete trait name (and unit) → | Average number of vessels per mm <sup>2</sup> of scanned wood cross-section              | Average cross-sectional area of vessel cells (µm <sup>2</sup> )    | Average cross-sectional perimeter of vessel cells (µm)             | Average cross-sectional major axis length of vessels (µm), assuming an elliptical | Average cross-sectional minor axis length of vessels (µm), assuming an elliptical           | Fraction of scanned cross-sectional wood area occupied by fibers                 | Fraction of scanned cross-sectional wood area occupied by vessels            | Average number of fibers per vessel in the scanned wood cross-section        | Average cross-sectional longest radial width of fibers (µm)                  | Average cross-sectional longest tangential width of fibers (µm)           | Average number of fibers per mm <sup>2</sup> of scanned wood cross-section | Average cross-sectional area of fibers (µm <sup>2</sup> ) | Average cross-sectional perimeter of fibers (µm) | Average wood density without vessels (kg/m <sup>3</sup> ) | Average wood density (kg/m <sup>3</sup> ) | Fiber weight per length (µg/m) [specification for the weight of fibers used in] | Average cellulose microfibril angle (degrees) | Wood stiffness: estimated acoustic modulus of elasticity (GPa) | Average fiber cell wall thickness (µm) | Average fiber surface area divided by its mass (m <sup>2</sup> /kg) |
| Short trait name →               | Vesswp                                                                                   | Vesarea                                                            | Vesperm                                                            | Vesmajax                                                                          | Vesminax                                                                                    | Fiberw                                                                           | Vesfrac                                                                      | FibFvessel                                                                   | FibRadLen                                                                    | FibTanLen                                                                 | FibNum                                                                     | FibArea                                                   | FibPerm                                          | Denswood                                                  | Dens                                      | FiberWt                                                                         | MFCA                                          | Stiff                                                          | WallThick                              | SpecificSurf                                                        |
